# Supplementary material for: Impact of Resuscitated Cardiac Arrest in the Brain-dead Donors on the Outcome of Liver Transplantation: A Retrospective and Propensity Score Matching Analysis
Source: PubMed Central journal article supplement (PMC11661731; doi:10.1097/as9.0000000000000522), 2024-11-25
Supplement: as9-5-e522-s001.pdf [file as9-5-e522-s001.pdf]

Supplemental Table 1. Unmatched cohort univariable and final multivariable logistic regression model based on EGF.

|                                                | Univariable Model |             |          | Multivariable Model |             |          |
|------------------------------------------------|-------------------|-------------|----------|---------------------|-------------|----------|
|                                                | OR                | 95% CI      | <i>p</i> | OR                  | 95% CI      | <i>p</i> |
| CA (vs. non-CA)                                | 0.894             | 0.810-0.987 | 0.027    | 0.869               | 0.766-0.985 | 0.025    |
| Donor age                                      | 1.007             | 1.006-1.009 | <0.001   | 1.001               | 0.999-1.004 | 0.297    |
| Donor gender (male)                            | 0.849             | 0.811-0.890 | <0.001   | 0.947               | 0.892-1.005 | 0.075    |
| Donor BMI                                      | 0.998             | 0.995-1.002 | 0.319    | 1.004               | 1.000-1.008 | 0.075    |
| Donor last AST                                 | 1.000             | 1.000-1.000 | 0.013    | 1.000               | 1.000-1.000 | 0.029    |
| Donor last ALT                                 | 1.000             | 0.999-1.000 | <0.001   | 1.000               | 0.997-1.000 | 0.025    |
| Donor last bilirubin                           | 1.022             | 1.007-1.037 | 0.003    | 1.050               | 1.026-1.074 | <0.001   |
| Donor last sodium                              | 0.999             | 0.996-1.002 | 0.540    | 1.000               | 0.997-1.003 | 0.935    |
| DRI                                            | 1.685             | 1.591-1.784 | <0.001   | 1.477               | 1.320-1.653 | <0.001   |
| Partial allograft                              | 1.300             | 1.082-1.563 | 0.005    | 1.205               | 0.943-1.539 | 0.137    |
| CIT                                            | 1.063             | 1.057-1.070 | <0.001   | 1.056               | 1.048-1.064 | <0.001   |
| Recipient age                                  | 1.000             | 0.997-1.002 | 0.749    | 1.005               | 1.003-1.008 | <0.001   |
| Recipient gender (male)                        | 0.885             | 0.844-0.929 | <0.001   | 0.971               | 0.915-1.030 | 0.324    |
| Recipient BMI                                  | 1.011             | 1.007-1.014 | <0.001   | 1.014               | 1.009-1.018 | <0.001   |
| Recipient medical condition (not hospitalized) | 0.679             | 0.660-0.699 | <0.001   | 0.667               | 0.637-0.700 | <0.001   |
| Recipient PVT                                  | 1.399             | 1.305-1.499 | <0.001   | 1.491               | 1.380-1.609 | <0.001   |
| Recipient SBP                                  | 1.430             | 1.306-1.566 | <0.001   | 1.280               | 1.140-1.436 | <0.001   |
| Previous abdominal surgery                     | 1.129             | 0.982-1.297 | 0.088    | 1.038               | 0.801-1.346 | 0.777    |
| MELD                                           | 1.018             | 1.016-1.021 | <0.001   | 1.000               | 0.996-1.004 | 0.958    |

EGF: early graft failure; OR: Odds ratio; CI: Confidence interval; CA: Cardiac arrest; BMI: Body mass index; AST: Aspartate aminotransferase; ALT: Alanine aminotransferase; DRI: Donor risk index; CIT: Cold ischemia time; PVT: Portal vein thrombosis; SBP: Spontaneous bacterial peritonitis; MELD:

---

Model for End-Stage Liver Disease.

Supplemental Table 2. Donor and patient demographic and clinical outcome between recipients of brain-dead donors with and without cardiac arrest

|                                | Unmatched         |                         |          | PSM               |                       |          |
|--------------------------------|-------------------|-------------------------|----------|-------------------|-----------------------|----------|
|                                | CA<br>(n = 7,364) | non-CA<br>(n = 107,838) | <i>P</i> | CA<br>(n = 7,157) | non-CA<br>(n = 7,157) | <i>P</i> |
| <b>Recipient</b>               |                   |                         |          |                   |                       |          |
| Age: years                     | 55 ± 11           | 54 ± 11                 | 0.102    | 55 ± 11           | 54 ± 11               | 0.121    |
| Male (%)                       | 4,874 (66.2)      | 71,337 (66.2)           | 0.740    | 4,734 (66.1)      | 4,757 (66.4)          | 0.684    |
| BMI: kg/m <sup>2</sup>         | 28.62 ± 6.00      | 28.56 ± 6.00            | 0.360    | 28.63 ± 5.99      | 28.68 ± 6.13          | 0.658    |
| <b>Race (%)</b>                |                   |                         |          |                   |                       |          |
| Caucasian                      | 5,371 (72.9)      | 76,674 (71.1)           | 0.062    | 5,213 (72.8)      | 5,118 (71.5)          | 0.076    |
| African-American               | 742 (10.1)        | 9,597 (8.9)             | 0.051    | 725 (10.1)        | 624 (8.7)             | 0.064    |
| Hispanic                       | 880 (12.0)        | 15,324 (14.2)           | <0.001   | 854 (11.9)        | 972 (13.6)            | 0.132    |
| Asian                          | 273 (3.7)         | 4,795 (4.4)             | 0.073    | 269 (3.8)         | 342 (4.8)             | 0.096    |
| Others                         | 98 (1.3)          | 1,448 (1.3)             | 0.994    | 96 (1.3)          | 101 (1.4)             | 0.774    |
| <b>Diagnosis (%)</b>           |                   |                         |          |                   |                       |          |
| HCV cirrhosis                  | 1,636 (22.2)      | 23,273 (21.6)           | 0.203    | 1,564 (21.9)      | 1,532 (21.4)          | 0.516    |
| HBV cirrhosis                  | 187 (2.5)         | 3423 (3.2)              | 0.052    | 178 (2.5)         | 240 (3.4)             | 0.112    |
| NASH                           | 1,197 (16.3)      | 16,911 (15.7)           | 0.191    | 1,172 (16.4)      | 1,115 (15.6)          | 0.352    |
| ALD                            | 1,796 (24.4)      | 25,813 (23.9)           | 0.382    | 1,753 (24.5)      | 1,772 (24.8)          | 0.783    |
| HCC                            | 1,076 (14.6)      | 16,927 (15.7)           | 0.103    | 1,070 (15.0)      | 1,088 (15.2)          | 0.872    |
| Others                         | 1,472 (20.0)      | 21,491 (19.9)           | 0.905    | 1,420 (19.8)      | 1,410 (19.7)          | 0.913    |
| MELD score                     | 22 ± 10           | 22 ± 10                 | 0.110    | 22 ± 10           | 22 ± 10               | 0.124    |
| <b>Pretransplant condition</b> |                   |                         |          |                   |                       |          |
| <b>(%)</b>                     |                   |                         |          |                   |                       |          |
| In ICU                         | 878 (11.9)        | 15,559 (14.4)           | <0.001   | 834 (11.7)        | 1,066 (14.9)          | <0.001   |
| Hospitalized not in ICU        | 1,354 (18.4)      | 20,061 (18.6)           | 0.653    | 1,326 (18.5)      | 1,377 (19.2)          | 0.276    |
| Not Hospitalized               | 5,132 (69.7)      | 72,218 (66.9)           | <0.001   | 4,997 (69.8)      | 4,714 (65.9)          | <0.001   |
| Hypertension (%)               | 1,025 (13.9)      | 14,153 (13.1)           | 0.052    | 993 (13.9)        | 994 (13.9)            | 1.000    |

|                                |              |               |        |              |              |        |
|--------------------------------|--------------|---------------|--------|--------------|--------------|--------|
| Diabetes (%)                   | 1,888 (25.6) | 27,428 (25.4) | 0.699  | 1,841 (25.7) | 1,835 (25.6) | 0.909  |
| Previous abdominal surgery (%) | 3,133 (42.5) | 44,699 (41.5) | 0.067  | 3,070 (42.9) | 2,973 (41.5) | 0.101  |
| PVT (%)                        | 872 (11.8)   | 10,512 (9.7)  | <0.001 | 857 (12.0)   | 678 (9.5)    | <0.001 |
| SBP (%)                        | 389 (5.3)    | 5,654 (5.2)   | 0.874  | 364 (5.1)    | 376 (5.3)    | 0.678  |
| Hospital stay: days            | 15.5 ± 20.0  | 16.3 ± 21.8   | 0.007  | 15.5 ± 20.0  | 16.2 ± 21.3  | 0.041  |
| <b>Donor</b>                   |              |               |        |              |              |        |
| Age: years                     | 40 ± 16      | 42 ± 17       | <0.001 | 40 ± 16      | 42 ± 16      | <0.001 |
| BMI: kg/m <sup>2</sup>         | 28.04 ± 6.76 | 27.40 ± 6.38  | <0.001 | 28.10 ± 6.77 | 27.52 ± 6.44 | <0.001 |
| Male (%)                       | 4,233 (57.5) | 64,442 (59.8) | <0.053 | 4,126 (57.6) | 4,285 (59.9) | 0.077  |
| Race (%)                       |              |               |        |              |              |        |
| Caucasian                      | 4,853 (65.9) | 70,742 (65.6) | 0.603  | 4,694 (65.6) | 4,688 (65.5) | 0.930  |
| African-American               | 1,437 (19.5) | 18,942 (17.6) | <0.001 | 1,415 (19.8) | 1,265 (17.7) | <0.001 |
| Hispanic                       | 874 (11.9)   | 14,409 (13.4) | <0.001 | 853 (11.9)   | 971 (13.6)   | 0.003  |
| Asian                          | 133 (1.8)    | 2661 (2.5)    | <0.001 | 130 (1.8)    | 164 (2.3)    | 0.054  |
| Others                         | 67 (0.9)     | 1084 (1.0)    | 0.465  | 65 (0.9)     | 69 (1.0)     | 0.875  |
| Cause of death (%)             |              |               |        |              |              |        |
| Anoxia                         | 3,769 (51.2) | 27,191 (25.2) | <0.001 | 3,711 (51.9) | 1,809 (25.3) | <0.001 |
| CVA/stroke                     | 1,659 (22.5) | 41,052 (38.1) | <0.001 | 1,574 (22.0) | 2,751 (38.4) | <0.001 |
| Head trauma                    | 1,808 (24.6) | 36,879 (34.2) | <0.001 | 1,751 (24.5) | 2,420 (33.8) | <0.001 |
| Others                         | 128 (1.7)    | 2,716 (2.5)   | <0.001 | 121 (1.7)    | 177 (2.5)    | 0.051  |
| Last creatinine: mg/dl         | 1.85 ± 1.94  | 1.60 ± 1.72   | <0.001 | 1.86 ± 1.95  | 1.61 ± 1.70  | <0.001 |
| Last BUN: mmol/L               | 26.0 ± 22.3  | 22.2 ± 18.8   | <0.001 | 26.2 ± 22.4  | 22.5 ± 19.0  | <0.001 |
| Last sodium: mmol/L            | 147 ± 8      | 148 ± 8       | <0.001 | 147 ± 8      | 148 ± 8      | 0.232  |
| Last INR                       | 1.37 ± 1.41  | 1.36 ± 1.34   | 0.572  | 1.37 ± 1.41  | 1.36 ± 1.16  | 0.611  |
| Last bilirubin: mg/dl          | 0.88 ± 1.03  | 0.93 ± 1.20   | <0.001 | 0.87 ± 0.80  | 0.93 ± 1.40  | 0.001  |
| Last ALT: U/L                  | 120 ± 240    | 74 ± 216      | <0.001 | 121 ± 242    | 80 ± 548     | <0.001 |
| Last AST: U/L                  | 117 ± 229    | 80 ± 155      | <0.001 | 117 ± 231    | 80 ± 145     | <0.001 |
| CIT: hours                     | 6.5 ± 2.9    | 6.7 ± 3.0     | <0.001 | 6.5 ± 2.8    | 6.7 ± 2.9    | 0.001  |

|                       |              |               |        |              |              |        |
|-----------------------|--------------|---------------|--------|--------------|--------------|--------|
| Diabetes (%)          | 883 (12.0)   | 11,786 (10.9) | 0.005  | 869 (12.1)   | 772 (10.8)   | 0.011  |
| Hypertension (%)      | 2,299 (31.2) | 36,990 (34.3) | <0.001 | 2,252 (31.5) | 2,485 (34.7) | <0.001 |
| DRI                   | 1.40 ± 0.35  | 1.44 ± 0.38   | <0.001 | 1.40 ± 0.35  | 1.44 ± 0.38  | <0.001 |
| Partial allograft (%) | 79 (1.1)     | 1,412 (1.3)   | 0.091  | 75 (1.0)     | 88 (1.2)     | 0.307  |

---

CA: Cardiac arrest; PSM: Propensity score matching; SD: Standard Deviation; BMI: Body mass index; HCV: Hepatitis C virus; HBV: Hepatitis B virus; NASH: non-alcoholic steatohepatitis; ALD: Alcoholic liver disease; HCC: Hepatocellular carcinoma; MELD: Model for end stage liver disease; ICU: Intensive care unit; PVT: Portal vein thrombosis; SBP: Spontaneous bacterial peritonitis; CVA: Cerebrovascular diseases; BUN: Blood urea nitrogen; INR: International normalized ratio; ALT: Alanine aminotransferase; AST: Aspartate aminotransferase; CIT: Cold ischemia time; DRI: Donor risk index.

Supplemental Table 3. Univariate and Multivariate Cox proportional-hazards regression models based on graft survival

| Covariates                           | Univariate analyses |        | Multivariate analyses |        |
|--------------------------------------|---------------------|--------|-----------------------|--------|
|                                      | HR (95% CI)         | P      | HR (95% CI)           | P      |
| CA (vs. non-CA)                      | 0.93 (0.88-0.98)    | 0.016  | 0.96 (0.90-1.02)      | 0.179  |
| Recipient age                        | 1.01 (1.01-1.02)    | <0.001 | 1.01 (1.01-1.02)      | <0.001 |
| Recipient gender (male)              | 1.03 (0.97-1.09)    | 0.401  | 1.04 (0.97-1.11)      | 0.324  |
| Recipient BMI                        | 0.99 (0.99-1.01)    | 0.233  | 0.99 (0.98-0.99)      | 0.026  |
| MELD                                 | 1.00 (0.99-1.01)    | 0.465  | 0.99 (0.99-1.00)      | 0.075  |
| Recipient diabetes                   | 1.25 (1.18-1.34)    | <0.001 | 1.20 (1.12-1.29)      | <0.001 |
| PVT                                  | 1.07 (0.97-1.18)    | 0.160  | 1.04 (0.94-1.15)      | 0.458  |
| Previous abdominal surgery           | 1.06 (1.01-1.13)    | 0.037  | 1.07 (1.01-1.15)      | 0.029  |
| Medical condition (not hospitalized) | 0.94 (0.91-0.98)    | 0.003  | 0.88 (0.83-0.93)      | <0.001 |
| Donor age                            | 1.01 (1.01-1.01)    | <0.001 | 1.00 (1.00-1.01)      | 0.047  |
| Donor gender (male)                  | 0.99 (0.94-1.05)    | 0.848  | 1.02 (0.96-1.09)      | 0.483  |
| Donor diabetes                       | 1.18 (1.08-1.29)    | <0.001 | 1.04 (0.94-1.15)      | 0.414  |
| Donor hypertension                   | 1.19 (1.12-1.26)    | <0.001 | 1.01 (0.93-1.09)      | 0.884  |
| CIT                                  | 1.02 (1.01-1.03)    | <0.001 | 1.01 (1.01-1.02)      | 0.004  |
| Partial allograft                    | 0.91 (0.68-1.20)    | 0.489  | 0.96 (0.70-1.31)      | 0.794  |
| DRI                                  | 1.46 (1.35-1.58)    | <0.001 | 1.29 (1.13-1.47)      | <0.001 |

HR: hazard ratio; CI: confidence interval; CA: Cardiac arrest; MELD: Model for end stage liver disease; PVT: Portal vein thrombosis; CIT: Cold ischemia time; BMI: body mass index; BUN: blood urea nitrogen; DRI: donor risk index.

Supplemental Table 4. Univariate and Multivariate Cox proportional-hazards regression models based on patient survival

| Covariates                           | Univariate analyses |        | Multivariate analyses |        |
|--------------------------------------|---------------------|--------|-----------------------|--------|
|                                      | HR (95% CI)         | P      | HR (95% CI)           | P      |
| CA (vs. non-CA)                      | 0.94 (0.89-0.99)    | 0.044  | 0.97 (0.91-1.03)      | 0.327  |
| Recipient age                        | 1.01 (1.01-1.02)    | <0.001 | 1.02 (1.01-1.02)      | <0.001 |
| Recipient gender (male)              | 1.04 (0.98-1.11)    | 0.229  | 1.05 (0.98-1.12)      | 0.206  |
| Recipient BMI                        | 1.00 (0.99-1.01)    | 0.301  | 0.99 (0.99-1.00)      | 0.028  |
| MELD                                 | 1.00 (0.99-1.00)    | 0.973  | 1.00 (1.00-1.00)      | 0.358  |
| Recipient diabetes                   | 1.31 (1.23-1.40)    | <0.001 | 1.24 (1.15-1.33)      | <0.001 |
| PVT                                  | 1.08 (0.98-1.20)    | 0.124  | 1.03 (0.93-1.15)      | 0.569  |
| Previous abdominal surgery           | 1.08 (1.02-1.15)    | 0.009  | 1.09 (1.02-1.16)      | 0.013  |
| Medical condition (not hospitalized) | 0.93 (0.90-0.97)    | <0.001 | 0.87 (0.83-0.93)      | <0.001 |
| Donor age                            | 1.01 (1.01-1.02)    | <0.001 | 1.00 (0.99-1.01)      | 0.103  |
| Donor gender (male)                  | 1.02 (0.96-1.08)    | 0.609  | 1.04 (0.97-1.12)      | 0.224  |
| Donor diabetes                       | 1.16 (1.06-1.27)    | 0.002  | 1.03 (0.93-1.15)      | 0.552  |
| Donor hypertension                   | 1.16 (1.09-1.24)    | <0.001 | 0.99 (0.92-1.08)      | 0.840  |
| CIT                                  | 1.02 (1.01-1.03)    | <0.001 | 1.01 (1.01-1.02)      | 0.020  |
| Partial allograft                    | 0.87 (0.65-1.17)    | 0.365  | 0.91 (0.65-1.26)      | 0.562  |
| DRI                                  | 1.41 (1.30-1.52)    | <0.001 | 1.29 (1.12-1.48)      | <0.001 |

HR: hazard ratio; CI: confidence interval; CA: Cardiac arrest; BMI: body mass index; MELD: Model for End-Stage Liver Disease; PVT: Portal vein thrombosis; CIT: Cold ischemia time; DRI: donor risk index.

Supplemental Table 5. Recipient and donor characteristics between CA Donors with CAT >30 min and CAT <30 min

|                                            | CAT <30 min<br>(n = 5,272) | CAT >30 min<br>(n = 1,885) | <i>P</i> |
|--------------------------------------------|----------------------------|----------------------------|----------|
| <b>Recipient</b>                           |                            |                            |          |
| Age: years                                 | 55 ± 11                    | 55 ± 11                    | 0.956    |
| Male (%)                                   | 3,495 (66.3)               | 1,239 (65.7)               | 0.671    |
| BMI: kg/m <sup>2</sup>                     | 28.58 ± 6.05               | 28.78 ± 5.85               | 0.208    |
| <b>Race (%)</b>                            |                            |                            |          |
| Caucasian                                  | 3,849 (73.0)               | 1,364 (72.4)               | 0.587    |
| African-American                           | 523 (9.9)                  | 202 (10.7)                 | 0.328    |
| Hispanic                                   | 636 (12.1)                 | 218 (11.6)                 | 0.591    |
| Asian                                      | 200 (3.8)                  | 69 (3.7)                   | 0.833    |
| Others                                     | 64 (1.2)                   | 32 (1.7)                   | 0.129    |
| <b>Diagnosis (%)</b>                       |                            |                            |          |
| HCV                                        | 1,156 (21.9)               | 408 (21.6)                 | 0.820    |
| HBV                                        | 134 (2.5)                  | 44 (2.3)                   | 0.667    |
| NASH                                       | 851 (16.1)                 | 321 (17.0)                 | 0.384    |
| ALD                                        | 1,311 (24.9)               | 442 (23.4)                 | 0.224    |
| HCC                                        | 757 (14.4)                 | 313 (16.6)                 | 0.020    |
| Others                                     | 1,063 (20.2)               | 357 (18.9)                 | 0.267    |
| MELD score                                 | 22 ± 10                    | 21 ± 10                    | 0.075    |
| <b>Pretransplant medical condition (%)</b> |                            |                            |          |
| In ICU                                     | 615 (11.7)                 | 219 (11.6)                 | 1.000    |
| Hospitalized not in ICU                    | 1,002 (19.0)               | 324 (17.2)                 | 0.084    |
| Not Hospitalized                           | 3,655 (69.3)               | 1,342 (71.2)               | 0.160    |
| Hypertension (%)                           | 716 (13.6)                 | 277 (14.7)                 | 0.229    |
| Diabetes (%)                               | 1,326 (25.2)               | 515 (27.3)                 | 0.066    |
| Previous abdominal surgery (%)             | 2,278 (43.2)               | 792 (42.0)                 | 0.371    |

|                        |              |              |        |
|------------------------|--------------|--------------|--------|
| PVT (%)                | 596 (11.3)   | 261 (13.8)   | 0.004  |
| SBP (%)                | 256 (4.9)    | 108 (5.7)    | 0.143  |
| <b>Donor</b>           |              |              |        |
| Age: years             | 40 ± 16      | 41 ± 16      | 0.010  |
| BMI: kg/m <sup>2</sup> | 27.81 ± 6.63 | 28.94 ± 7.09 | <0.001 |
| Male (%)               | 3,085 (58.5) | 1,041 (55.2) | 0.013  |
| Race (%)               |              |              |        |
| Caucasian              | 3,431 (65.1) | 1,263 (67.0) | 0.134  |
| African-American       | 1,045 (19.8) | 370 (19.6)   | 0.866  |
| Hispanic               | 650 (12.3)   | 203 (10.8)   | 0.075  |
| Asian                  | 96 (1.8)     | 34 (1.8)     | 1.000  |
| Others                 | 50 (0.9)     | 15 (0.8)     | 0.671  |
| Cause of death (%)     |              |              |        |
| Anoxia                 | 2,327 (44.1) | 1,384 (73.4) | <0.001 |
| CVA/stroke             | 1,296 (24.6) | 278 (14.7)   | <0.001 |
| Head trauma            | 1,546 (29.3) | 205 (10.9)   | <0.001 |
| Others                 | 103 (2.0)    | 18 (1.0)     | 0.003  |
| Last creatinine: mg/dl | 1.74 ± 1.87  | 2.21 ± 2.12  | <0.001 |
| Last BUN: mmol/L       | 24.7 ± 21.8  | 30.4 ± 23.6  | <0.001 |
| Last sodium: mmol/L    | 147 ± 8      | 147 ± 8      | 0.215  |
| Last INR               | 1.38 ± 1.58  | 1.35 ± 0.77  | 0.509  |
| Last bilirubin: mg/dl  | 0.89 ± 0.84  | 0.79 ± 0.64  | <0.001 |
| Last ALT: U/L          | 109 ± 230    | 153 ± 270    | <0.001 |
| Last AST: U/L          | 109 ± 236    | 140 ± 214    | <0.001 |
| CIT: hours             | 6.5 ± 2.9    | 6.5 ± 2.6    | 0.725  |
| Diabetes (%)           | 575 (10.9)   | 294 (15.6)   | <0.001 |
| Hypertension (%)       | 1,593 (30.2) | 659 (35.0)   | <0.001 |
| DRI                    | 1.40 ± 0.35  | 1.41 ± 0.33  | 0.189  |
| Partial allograft (%)  | 61 (1.2)     | 14 (0.7)     | 0.147  |

| Outcomes             |              |             |        |
|----------------------|--------------|-------------|--------|
| Graft failure: n (%) | 1,554 (29.5) | 641 (34.0)  | <0.001 |
| EGF: n (%)           | 265 (5.0)    | 147 (7.8)   | <0.001 |
| Hospital stay: days  | 15.5 ± 20.3  | 15.6 ± 19.3 | 0.810  |

CAT: cardiac arrest time; CA: Cardiac arrest; DBD: Donation after brain death; SD: Standard Deviation; BMI: Body mass index; HCV: Hepatitis C virus; HBV: Hepatitis B virus; NASH: non-alcoholic steatohepatitis; ALD: Alcoholic liver disease; HCC: Hepatocellular carcinoma; MELD: Model for end stage liver disease; ICU: Intensive care unit; PVT: Portal vein thrombosis; SBP: Spontaneous bacterial peritonitis; CVA: Cerebrovascular diseases; BUN: Blood urea nitrogen; INR: International normalized ratio; ALT: Alanine aminotransferase; AST: Aspartate aminotransferase; CIT: Cold ischemia time; DRI: Donor risk index.
